# Supplementary material for: Drivers of the spatiotemporal distribution of dissolved nitrous oxide and air-sea exchange in a coastal Mediterranean area
Source: Copernicus journal article supplement (doi:10.5194/egusphere-2024-4166), 2025-01-23

1 **SUPPLEMENT**

2 **Figure S1:** Training process monitoring RMSE for both training and validation sets.

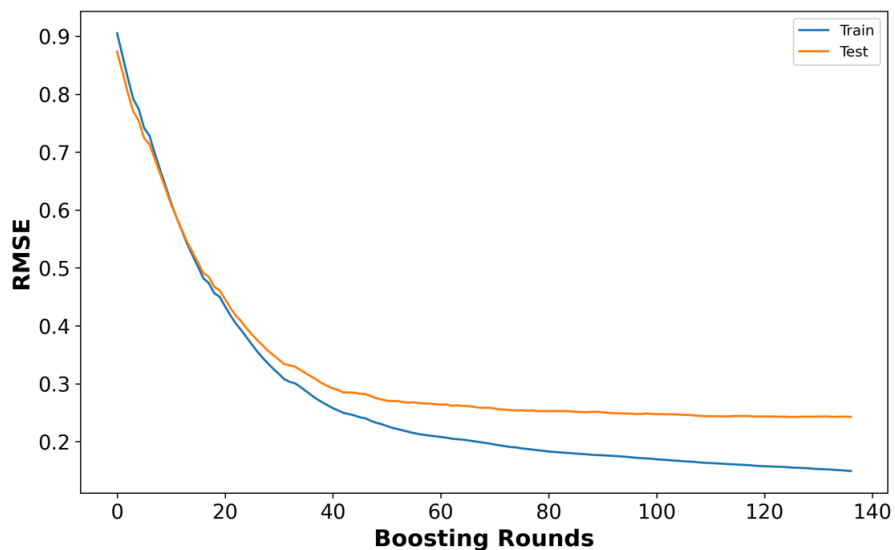

3

4

5

6

7 **Figure S2:** Relationship of N<sub>2</sub>O and main environmental parameters A) Temperature (°C), B) Chlorophyll

8 a (Chla:  $\mu\text{g L}^{-1}$ ) and C) salinity (psu) based on the generalized additive models applied. The black dots

9 represent residual concentrations in  $\text{nmol L}^{-1}$ . The inward tick marks on the horizontal axes show data

10 distributions. The model  $R^2$  was 0.96 in the training set and explained 96 % of the response variable. *P*-

11 values for the terms in the model are  $<0.005$  for Temperature and Chla and 0.1390 for salinity.

12

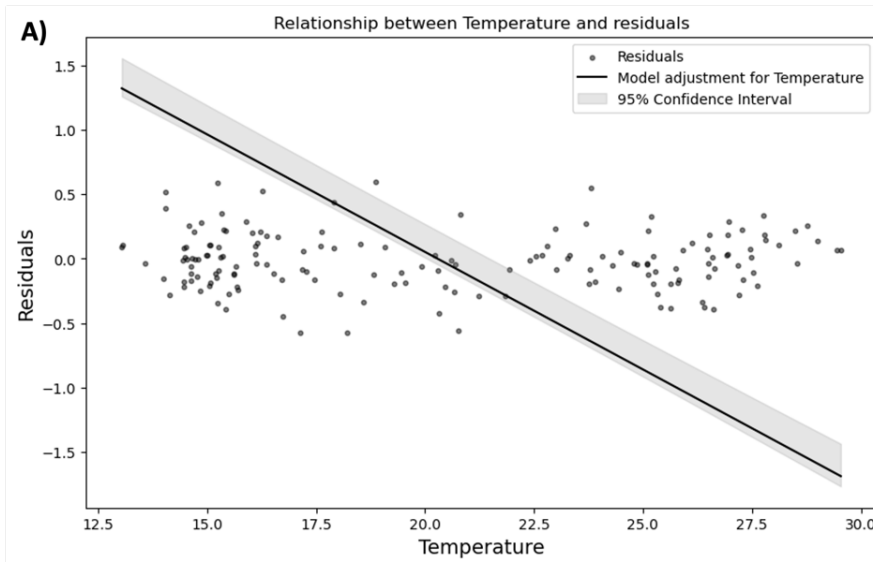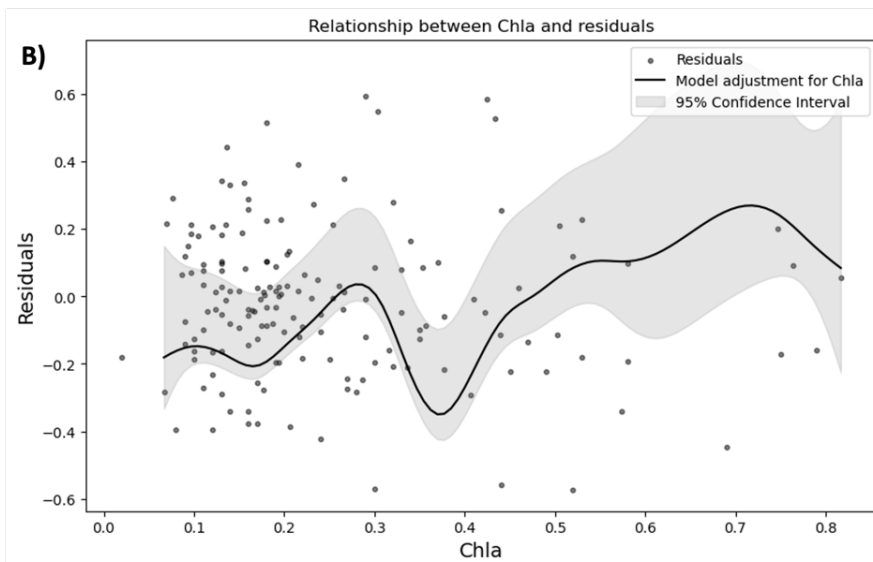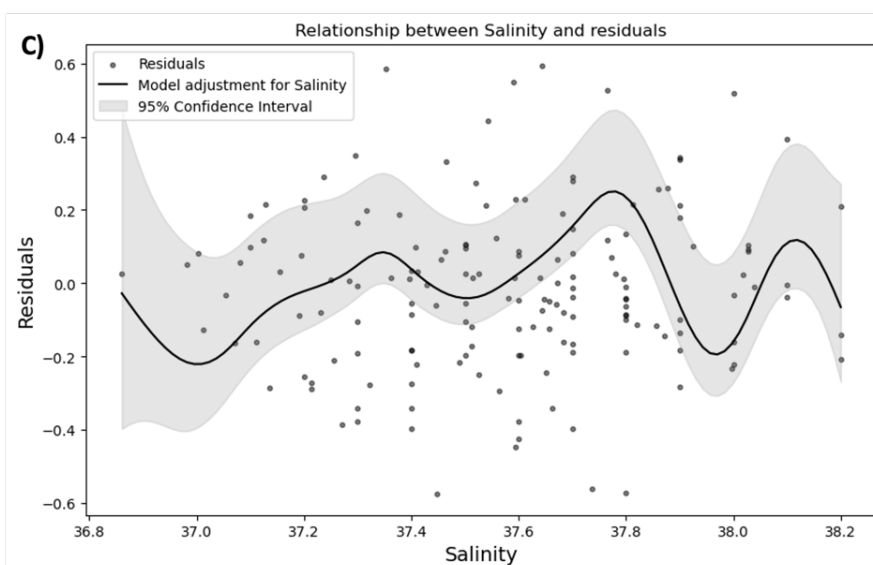

Supplement: Supplementary file 1 [file egusphere-2024-4166-supplement.pdf]
